# Supplementary material
Source: MDPI journal article supplement (https://www.mdpi.com/2077-0472/14/1/133)
Supplement: s1 [file s1]

The amino acid sequences of the ZIP proteins

>AtGUFA

MDSQMLVALGLSLVGGGLSTSLGALFVVLSETPNMKMLGLLQGFASGLMLSISF  
LDLAHNAINSIGFFKANLWFFGGVIFACITKFIPEPTLGPSTDGKRRKKNNGDE  
GGKDDMMKKHRKQVLYSGLITAIGISLHNFPEGMAVFLGSIKGMRVGVNLALA  
IALHNIPEGVAVALPIYFATESKWQAFKLATLSGLAEPLGVIIIVAYLFPRSLSPEIL  
EGLLGAVGGIMAFLLTHEMLPLAFDYAGQKQAVKAVFFGMACMSASLYFLEL  
SLPETMSL

>AtIAR1

MSFSLRKLLVPILVLVFLDLCVESGFSQSTPARDDHVHHHGGGCSHSHDHDH  
DHDHDHHVKKTTAKVEMKLPEELAEEDMRLCGFGPCLHDHDHSSSTLTGF  
ALWLNALGCSLLVSLASLICLVLLPIMFVQGKPSKWFVDSLALFGAGAMLGD  
AFLHQLPHAFGGGGHSHSNDHHENHDHHDHSHSDSPSHSHSIQDLSVGLSVLA  
GIVVFLLEKLVRYVEENSSGSNTWGHHHHHHHAGSKKLKDEGDHNNLDQQ  
SSSDAIVNSSEKVS GGSTD KSLRKRKTSASDATDKSDSGTEITSDGKSDKPEQV  
ETRSSSLVFGYLNLFSDGVHNFTDGMALGSAFLIYGSVGGWSRTMFLLAHELP  
QEIGDFGILVRSGFTVT KALFFNFLSALVALAGTALVLVWGNPEGQSSLIEGFTA  
GGFIYIAGVLAEMNNSGKSTLKNSACHLISLILGMSVALCISLIE

>AtIRT1

MASNSALLMKTIFLVLFVSFAISPATSTAPEECGSESANPCVNKAKALPLKVIA  
IFVILIASMIGVGAPLFSRNVSFLQPDGNIFTIICKFASGIILGTGFMHVL PDSFEM  
LSSICLEENPWHKFPFSGFLAMLSGLITLAIDSMATSLYTSKNAV GIMPHGHGH  
GHGPANDVTLP IKEDDSSNAQLLRVRIAMVLELGIIVHSV VIGLSLGATSDTC  
TIKGLIAALCFHQMFEGMGLGGCILQA EYTNMKKFVMAFFFAVTT PFGIALGI  
ALSTVYQDNSPKALITVGLLNAC SAGLLIYMALVDLLAAEFMGPKLQGSIKM  
QFKCLIAALLGCGGMSIIAKWA

>AtIRT2

MATTKLVYILLILFTFTVSPAISTAPEHCDSGFDNPCINKAKALPLKIVAIVAILTT  
SLIGVTSPLFSRYISFLRPDGNNGFMIVKCFSSGIILGTGFMHVL PDSFEM LSSKC  
LSDNPWHKFPFAGFVAMMSGLVTLAIDSITTSLYTGKNSVGPVPDEEY GIDQE  
KA IHMVGHNHSHGHGVVLATKDDGQLLR YQVIAMVLEV GILFHSV VIGLSLG  
ATNDSCTIKGLIIALCFHHLFEGIGLGGCILQADFTNVKKFLMAFFFTGTTPCGI  
FLGIALSSIIYRDN SPTALITIGLLNAC SAGMLIYMALVDLLATEFMGSMLQGSIK  
LQIKCFTAALLGCAVMSVAVWA

>AtIRT3

MFFVDVLWKLVPYLYFGSETKSLSATESILQIVPEAMAATSSNVLCNASESDLC  
RDDSA AFLK FVAIASILLAGAAGVTIPLIGNRRFLQTDGNLFVTAKAFAAGV  
ILATGFVHMLAGGTEALKNPCLPDFPWSKFPFPGFFAMIAALITLFVDFMGTQ  
YYERKQEREASESVEPFGREQSPGIVVPMIGEGTNDGKVFGCEEDSGGIHIVGIH  
AHAAHHRHSHPPGHDSCEGH SKIDIGHAHAHGHGHGHGHGHVHGGLDAVN  
GARHIVVSQVLELGIVSHSIIIGLSLGVSQSPCTIRPLIAALS FHFQFFEGFALGGCI  
SQAQFRNKSATIMACFFALTPIGIGIGTAVASSFN SHSVGALVTEGILDSLSAGI  
LVYMALVDLIAADFLSTKMRCNFRLQIVSYV MLFLGAGLMSSLA IWA

>AtZIP1

MSECGCFSATTMLRICVVLIICLHMCCASSDCTSHDDPVSQDEAEKATKLKLG  
SIALLLVAGGVGVSLPLIGKRIPALQPENDIFFMVKAFAAGVILCTGFVHILPDA  
FERLSSPCLEDTTAGKFPFAGFVAMLSAMGTLMDTFATGYYSKRQHFSNNHGS  
KQVNVVVDEEEHAGHVHIIHTHASHGHTHGSTELIRRRIVSQVLEIGIVVHSVII  
GISLGASQSIDTIKPLMAALSFFHQFFEGGLGCGCISLADMKSKSTVLMATFFSV  
TAPLGIGIGLGMSSGLGYRKESKEAIMVEGMLNAASAGILIYMSLVDLLATDF  
MNPRLQSNLWLHLAAYLSVLGAGSMSLLAIWA

>AtZIP2

MALSSKTLKSTLFFLSIIFLCFSLILAHGGIDDGDEEEETNQPPPATGTTTVVNL  
RSKSLVLVKIYCIILFFSTFLAGVSPYFYRWNESFLLLGTQFSGGIFLATALIHFL  
SDANETFRGLKHKEYPYAFMLAAAGYCLTMLADVAVAFVAAGSNNNHVGAS  
VGESREDDDDVAVKEEGRREIKSGVDVSQALIRTSGFGDTALLIFALCFHSIFEGI  
AIGLSDTKSDAWRNLTISLHKVFAAVAMGIALLLKIPKRPFFLTVVYSFAFGIS  
SPIGVGIGIGINATSQGAGGDWTYAISMGLACGVFVYVAVNHLISKGYKPREEC  
YFDKPIYKFIAVFLGVALLSVVMIWD

>AtZIP3

MKTKNVKLLFFFFSVSLLLIADVNAAEHSHGGPKCECSHEDDHENKAGARK  
YKIAAIPTVLIAGIIGVLFPLLKGVPFSLRPETCFFFVTKAFAAGVILATGFMHV  
LPEAYEMLNSPCLTSEAWFEPFTGFIAMIAAILTSLVDTFATSSFYKSHCKASKR  
VSDGETGESSVDSEKVQILRTRVIAQVLELGIIVHSVVIGISLGASQSPDAKAL  
FIALMFHQCFEGLGCGCIAQGKFKCLSVTIMSTFFAITTPIGIVVGMGIANSYD  
ESSPTALIVQGVNAASAGILIYMSLVDLLAADFTHPKMQSNTGLQIMAHIAL  
LGAGLMSLLAKWA

>AtZIP4

MASSTTKILCDAGESDLCRDDSAFLLKFVAIASILLAGAAGVAIPLIGNRRF  
LQTEGNLFVAAKAFAAGVILATGFVHMLAGGTEALSNPCLPDFPWSKFPFPGF  
FAMVAALATLLVDFMGTQYYERKQERNQAATEAAAGSEEIAVVPVVGERTD  
NKVFGEEDGGGIHIVGIRAHAAHHRHSHSNHGTCDGHAHGHSHGHMHGNS  
DVENGARHVVVSQILELGIVSHSIIIGLSLGVVSQSPCTIRPLIAALSFFHQFFEGFA  
LGGCISQAQFRNKSATIMACFFALTTPLGIGIGTAVASSFNHSPGALVTEGILDS  
LSAGILVYMALVDLIAADFLSKRMSCNLRLQVVSYVMLFLGAGLMSALAIWA

>AtZIP5

MRITQNVKLLFFFFFISFLFIAVSAGESKCECSHEDDEANKAGAKKYKIAAIPS  
VLAAGVIGVMFPLLKGFFPSLKPETTTFFVTKAFAAGVILATGFMHVLPEGYE  
KLTSPCLKGEAWFEPFTGFIAMVAAILTSLVDSFATSYFHKAHFKTSKRIGDGE  
EQDAGGGGGGGDELGLHVHAHGHTHGIVGVESGESQVQLHRTRVVAQVLEV  
GIIVHSVVIGISLGASQSPDTAKALFAALMFHQCFEGLGCGCIAQGNFNCMSI  
TIMSIFFSVTTPVGIAVGMAISSSYDDSSPTALIVQGVNAASAGILIYMSLVDL  
AADFMHPKMQSNTRLQIMAHISLLVGAGVMSLLAKWA

>AtZIP6

MASCVTGTEAAIRAAACRDGEEASHLKIVAVFAIFLTSVFGVWGPVLLAKYFH  
GKPLYDKAILVIKCFAAGVILSTSLVHVLPEAFESLADCQVSSRHPWKDFPFAG  
LVTMIGAITALLVDLTASEHMGHGGGGGGDGGMEYMPVGKAVGGLEMKEG  
KCGADLEIQENSEEEIVKMKQRLVSQVLEIGIIFHSVIIIGVTMGMSQNKCTIRPL

IAALSFHQIFEGLGLGGCIAQAGFKAGTVVYMCLMFAVTTPLGIVLGMVIFAA  
TGYDDQNPNALIMEGLLGSFSSGILIYMALVDLIAIDFFHNKMLTTCGESGSRL  
KKLCFV

>AtZIP7

MAYSKACYKLTTITILLLSFTLPSLAGNAENADVSECKAESGDLSCHNNKEAQ  
KLKIIAIPSILVASMIGVSLPLFSRSIPALGPDREMSVIVKTLASGVILATGFMHV  
LPDSFDDLTSKCLPEDPWQKFPFATFITMISALLVLMIESFAMCAYARRTSKREG  
EVVPLENGSNSVDTONDIQTLENGSSYVEKQEKVNEDKTSELLRNKVIAQILE  
LGIVVHSVIGLAMGASDNKCTVQSLIAALCFHQLFEGMGLGGSILQAQFKS  
KTNWTMVFFFSVTPFGIVLGMAIQKIYDETSPTALIVVGVLNACSAGLLIYM  
ALVNLLAHEFFGPKIQGNIKLHVLGYVATFTGAAGMSLMAKWA

>AtZIP8

MATTTQHMNQIFLVLLISFAISPAISTVPKECETDSTDSCIDKTKALPLKIVAIV  
AILVTSMIGVAAPLFSRYVTFLHPDGKIFMIKCFASGIILGTGFMHVLPSDFEM  
LSSPCLEDNPWHKFPFTGFVAMLSGLVTLAIDSIATSLYTKKAVADDSEERTTP  
MIIQIDHLPLTTKERSSTCSKQLLRVIATV

>AtZIP9

SILISGAAGVSIPLVGTLPLNGGLMRGAKAFAAGVILATGFVHMLSGGSKALS  
DPCLPEFPWKMFPPPEFFAMVAALLTLLADFMITGYPERKQEKMMNQSVESL  
GTQVSVMSDPGLESGFLRDQEDGGALHIVGMRAHAHHRHSLSMGAEGFEA  
LSKRSGVSGHGHGHSHGHGDVGLDSGVRHVVSQILEMGIVSHSIIIGISLGVS  
HSPCTIRPLLLALSFHQFFEGFALGGCVAEARLTPRGSAMMAFFFAITTPIGVAV  
GTAIASSYNSYSVAALVAEGVLDLSAGILVYMALVDLIAADFLSKKMSVDFR  
VQVVSYCFLFLGAGMMSALAIWA

>AtZIP10

MTKSHVIFSASIALFLLLSISHFPGALSQSNKDCQSKSNYSCIDKNKALDLKLL  
SIFSILITSLIGVCLPFFARSIPAFQPEKSHFLIVKSFASGIILSTGFMHVLPSDFEM  
LSSPCLNDNPWHKFPFAGFVAMMSAVFTLMVDSITTSVFTKSGRKDLRADVAS  
VETPDQEIGHVQVHGHVHSHTLPHNLHGENDKELGSYLQLLRYLILAIVLELG  
IVVQSIIVIGLSVGDTNNTCTIKGLVAALCFHQMFEGMGLGGCILQAIEYGVVK  
KAVMAFFFAVTPFGVVLGMALSKTYKENSPELITVGLLNASSAGLLIYMAL  
VDLLAADFMGQKMQRSIKLQLKSYAAVLLGAGGMSVMAKWA

>AtZIP11

MSRSLVFFFLFLVLVVPCLSHGTGGDHDDDEASHVKSSDLKSKSLISVKIACLV  
IIFVLTFISGVSPYFLKWSQGFLVLGTQFAGGVFLATALMHFLSDADETFRGLLT  
AEGESEPSPAYPFAYMLACAGFMLTMLADSVIAHIYSKTQNDLELQGEDKSNQ  
RSATTETSIGDSILLIVALCFHSVFEGIAIGISETKSDAWRALWTITLHKIFAAIAM  
GIALLRMIPDRPLFSSITYSFAFAISSPIGVAIGIVIDATTQGSIAWIFALSMSLAC  
GVFVYVSVNHLLAKGYRPNKKVHVDEPRYKFLAVLFGVVVIAIVMIWDT

>AtZIP12

MSRFRKTLVSAFVLCLVIFPLLVSAAEEENQCGGSKGGSAAEKASALKYKIIAF  
FSILIAGVFGVCLPIFGLKTESNFFMYVKAFAAGVILATGFVHILPDATESLTSSC  
LGEEPPWGDFFPMTGLVAMAASILTMLIESFASGYLNRSRLAKEGKTLPVSTGG  
EEEHAHTGSAHTHASQGHSHGSLIPQDDDHIDMRKKIVTQILELGIVVHSVII

GISLGASPSVSTIKPLIAAITFHQLFEGFGLGGCISEAKFRVKKIWVMLMFFALT  
APIGIGIGIGVAEIYNENSPMALKVSGFLNATASGILIYMALVDLVAPLFMNQKT  
QSSMKIQVACSVSLVVGAGLMSLLAIWA

>AtZIP13

MFVRSNILRALIFTVLEKTCLEIKMMHSSCKGLVLLLFLFVVVFIGNTDANAQ  
WEVSHKVRASPHENMGRNVIDGSGVEKTLHDIGMGEKRGTHNKVSVSTVAL  
FTLAMAAATGLGAVPFFFVELDPQWAGICNGMAAGVMLAASF DLVKEGQEH  
GSGNWVVTGILAGALFIWLCKQILEQYGEVSMLDIKGADATKVVLVIGIMTL  
HSFGE GSGVGVSFAGSKGFSQGLLVTLAIAVHNIPEGLAVSMVLASRGVSPQN  
AMLWSIITSLPQPLVAVPAFLCADAFSKFLPFCTGFAAGCMIWMVIAEVL PDAF  
KEASPSQVASAATISVASMEALSTLFDASGFFVSLLFGLGPLLGGVFLVASAVTF  
RLQHALLMGVASGIAFVLGLWESFTHDYNS EDASGFFVSLLFGLGPLLGGVFL  
VASAVTFRLQHALLMGVARPLQLLSAKMGLIPLVSLLAIGAGLSHFTSSTILN  
VTGRKKS RAGSLINS GIAFVLGLWPVTNFPTSVITLQSLACGAVGFHALAEGL  
ALGVAAPNAYGLGRH MVLPVSLHGLPRGTAVASCVFGATDSWHAALAAAALI  
GFVGPISAIGSILAGIDYSGLDHVMV VACGGLLPSFWQVIKRAVRLERRKGSV  
GMVLGLACAVVCLTFTRLVCLHTPYCNSAPEAVR

>CmZIP1

MLRFLFLLLLLLLLLSSAAAHSGHSD EDAAPEDGPSPPNLRSKPLILVKIACLILI  
FFGT FIPGISPCFFK WNDGFLLLGTQFAGGVFFGTAMMHFLSDANETFRDLTD  
NDYPFAFMLASSGFLMTMAADCVISYLYRKPTADSSTDVELGGAATSPSKFQV  
QNGSNGHHPHPHQALT TMGSFGDSILLIVALCFHSVFEGIAIGVAETEADAWK  
ALWTISLHKVFAAIAMGIALLRMIPNRLLSSAAYSFAFAISSPIGIAIGIVIDATT  
QGAVADWIFAISMGLACGVFIYVSINHLLSKGYTPRDSVVVDNPNYKFLAVLL  
GIGVIAILANGIADG

>CmZIP2

MSKFFFLFLALFLPALVSGGGVSCSCDESDGGA AVSAKEAMKYKVG SIGSVLV  
AGAAGVSLPLVGKKIRCLRPENDIFFMIKAFAAGVILSTGFIHILPDAFQDLTSP  
CLGQNPWGDFPFAGFIAMAASIATLMVDTFATSFYQRRHFSKTKQVIADQETG  
NDHAGHVHVHTHATHGHAHGSAPTPTGELSLADLIRYRIISQVLELGIVVHSV  
IGISLGASLSPATIKPLLVALSFHQFFEGMGLGGCISQAQFRWQSAAAMATFFSL  
TAPVGIAVGIGISGVYRDN SRTALIVEGSMNSASAGILIYMALVDLLAADFMNP  
RMQNNLGLQLGANISLLLGAACMSVLAKWA

>CmZIP3

MFFFEDLLQVLCIRGFQDKTRLLSESFIRT VSESMTNSACGVSEVELCRNDSAA  
LHFKLIAIASILTAGVIGIAIPLFGKQRRFLKTDGNLFVAAKAFAAGVILATAFVH  
MLPDGSKALSDPCLPEFPWSKFPGFFAMMASLLTLLVDFVGTQYYERKQG  
MIRSKEEANRVGSLVDTGLESGIVPAGELNVKVFG EEDGGGMHIVGMHAHAA  
HHRHNHPQGKEACDGHVAVHDHGHGHAHGHGHS HGLDVDDDES GVRHV  
VSQILELGIVSHSVIIGLSLGVSHSPCTIRPLIAALS FHQFFEGFALGGCISQAQFN  
TLSTSLMAVFFAITTPLGIAVGAAVASTYNPNST GALVAEGILDSLSAGILVYMA  
LVDLIAADFLSKRMSCNFRLQLVSYCTLFLGAGLMSSLALWA

>CmZIP4

MASQVLVALALSLVGGFSTSLGALFVVL SGAPNLKMLGLLQGFAAGLMLSISF

LDLAHNAINSIGFLKGNLWFFAGVIFFAFVAHFIPEPTLGPVSDTKRRKDKDEG  
GKDLMKKHRRQVLYSGIITAIGISLHNFPEGMAVFLGSIKGLRVGLNLALAIAL  
HNIPEGVAVALPVYFATQSKWQAFKLATLSGFAEPLGVVIVAYLFPSSLSPEILE  
GLLGSVGGVMAFLTLEMLPLAFDYAGQKQAVKVVFLGMACMSASLYFLEIS  
LPEDLSL

>CmZIP5

MPMPMPDFKLHSLLSFFFLFLLLIPSVIAAADQCPCPEDSEEDGGKRDDTLALK  
YKIVAIATILLAGIIGVVIPLLGKVIPALSPEKDIFFVIKAFAGVILATGFIHVLPD  
AYEKLTSKLNHPWGKFPFTGLVAMVAAIGTLMMDAGASSYYTRIHLNKAQ  
PELNGDDEMRRGGGGHGHVHVHHTHGHGHAHGSADVGGSTEILRHRVISQ  
VLELGIVVHSIIIGIGLVSETPKTIRPLVAAITFHQLFEGMGLGGCIAQAKFKN  
RATILMGLFFCLTTPLGIAIGIAVTKGYDEDSPKALIVEGILNAASSGILIYMALV  
DLAADFMMNPRMQSNGKLQLLANVSLILGAALMSLLAIWA

>CmZIP6

MARNLIFLLLLFSFSSPSLSASIPSPNSECEAQLQQGCHDRAESLKLKLIATIL  
VASMIGVSLPLFSRAMPVLQPEGKTFIVKAFASGVILATGYMHVLPDSFNFLT  
SPCLPENPWRKFPFPTFIAMLSAIMTLMDSFTLSHYNKQSVQDQLSEEEEIKN  
ENRKEMSENLGKEEGTGKKLDSQLLRHRVIAQLLEAGILVHSVIGLSLGASE  
NPCTIRPLIAALCFHQLFEGMGLGGCILQAEYRIKMKAIMVFFFSVTPFGIGL  
GIGLSNVYSENSPTALIVVGILNALSAGLLNYMALVDLLAHDFMGPQLQANL  
KLHIWAYVAVLLGVGGMSLLAKWA

>CmZIP7

MTVDFKRVLLFSLLFLLFCGRAIAEFEHGN SQKIISAPDKSGIKVIDGSGTENLI  
GFEDTNYLLHERKGGSRVSVSTVAVFTLAMAAATGLGAVPFFFVELDPQWAG  
LCNGMASGVMLAASFDLIQEGQEHGAGNWVIGILAGGIFIWLCKKFLEQYG  
EVSMLDIKGADATKVVLIIIGIMTLHSFGEGSGVGVSFAGSKGFSQGLLVTLAIA  
VHNIPEGLAVSMVLASRGVSPQNALLWSVITSLPQPIVAVPSFICADAFNKFLPF  
CTGFAAGCMIWMVVAEVLPAFKEASPSQVASAATLSVAFMEALSTLFQSFTH  
EYNSGDVSGFFVSLLFGVGPLLGGVLVVFHAHAFHLQHALLMG TASGIAFILG  
AWRPLQLLFSSKMDFIPLTTLTLGAAFIHFSSSSLLKLAGQKKASVNDLAAS  
NFSVSVHTLQSFLSCGAIAFHALAEGLALGVAAPKAYGFGRHIVLPVSLHGLP  
RGA AVASCIFGATDSWHGSLMSAALIGFVGPIAIGAILAGIDYSGLDHVMVLA  
CGGLLPSFGSIIKRAMRLDTQKSSSGLVIGLGFAILCLMCTKLVCLHTPYCNSA  
PEAVR

>CmZIP8

MPNSCFFPFIFASALVFSFLDLSFAHGS LGHHQCSHSHGHHQHAAHHRHDDD  
LSVTSKLLPEELAEEDMRLYGFGRPYVEHDHESVGSSDLSGLGLWIRALGCS  
LLISMASLICLILLPVIFVRGKPSKAVVDSLALFGAGAMLGDAFLHQLPHAFFG  
GKHSHSHADHHGHSHSEDEHSHSHAHTLEDLSVGMSVLAGIVLFLVEKIVR  
YVEDNSEGGNDWSHGHHHHHKNNKKLKDDSDSPDTTDKKGRAKLLDGV PND  
SKEDQGTPQKSVPRKRNGKSASRDDKEDLVAANGLTADVNSSQEFPKTPSNL  
VFGYLNLFSDGVHNFTDGMALGSAFLLYGSVGGWSRTVFLLAHELPQEIGDF  
GILVRSGFSVAKALFFNFLSALVALAGTAIALLMGTDPGHSSLIEGFTAGGFIYA  
VAGVLAEMNSSSKSTIRTTVFQLTSLVLGMAVALGISLIE

>CmZIP9

MAAACPTDFTHDSACRDGRAAAHLKLISIFLIFITSVIGVSSPVLLTRFFH GKPL  
YDKAILTVKSFAAGVILSTSLVHVLPDAFDALSDCRVASQHPWRDFPFSGLVT  
MIGALVALFVDVTATSHVEHDQYNPVEVKGGEDSGGEIGLLVAGERKSEETGE  
GIGEEELVKMKQKLVSKEIGIIFHSVIIGVTMGMSQNNQCTIKPLVAALAFHQI  
FEGMGLGGCIAQAGFSFTTTAYMCLMFSVTTPMGHILGMILFSLTGYDDSNPK  
ALIMEGLLGSFSSGILIYMALVDLIAALDFFHNKLMTSNQWLKKICFIALLLGST  
SMSILALWA

>CmZIP10

MASFTKLISIFLFLCFLSIQAVSQSDECETT VNSCTNKGKALRLKIIAIFSILIAS  
VIGVGSPLVTRSIPMLHPDRNMFVILKAFAAGIILATGFMHVLPDSFDMLWSNC  
LKENPWHKFPFSGFVAMMSAIVTLMVDSMATS LYTKKHNEVMPENSPRGGD  
DHESPVVSGGHFHHGHHMDAKETNAGSQLLR YRVVAMVLEMGIVVHVS VVIG  
LSLGATNDTCTIKGLVAALCFHQMFEGMGLGGC ILQAEYKWMKKAIMVFFFS  
VTPFGIALGIGLSKTYKENSPIALITVGLLNASSAGLLIYMALVDLLSADFMG  
PKLQGSIKLQVKSYIAVLLGAGAMSLMAKWA

>CsZIP1

MASFTKPFSIFLFLICFFSIQAVSQSDECETT ANSCTNKHKALRLKIIAIFSILIAS  
VIGVGSPLVTRSIPMLHPDRNMFVILKAFAAGI ILATGFMHVLPDSFDMLWSNC  
LKENPWHKFPFSGFVAMMSAIVTLMVDSMATS LYTKKHNEVMPENSPRGGD  
DHELPVVSGGHFHHGHHMDTKETNAGSQLLR YRVVAMVLELGIVVHVS VVIG  
LSLGATNDTCTIKGLVAALCFHQMFEGMGLGGC ILQ

>CsZIP2

MFFFEDLLQMLCIRGFQDKTRLLSESFIRT VSESMANSACGVSELELCRND SA  
ALHFKLIAIASILTAGVIGIALPLFGKQRRFLK TDGNLFVAAKAFAAGVILATAF  
VHMLPDGSKALSDPCLPEFPWSKFPFSGFFAM MASLLTLLVDFVGTQYYERK  
QGIIRSKEEANRVGSLMDTGLESGIVPAGDLN VKVFGEEEGGGMHIVGMHAH  
AAHHRHNHPQGKEACDGHMGVHDHGHGHAHGH GHSHGLDGDDESGVRH  
VVVSQILELGIVSHSVIIGLSLGVSHSPCTIR PLIAALS FHQFFEGFALGGCISQA  
QFNTLSTSLMAVFFAITTPLGIAVGA AVASTYNPNSTGALVAEGILDSLSAGILV  
YMALVDLIAADFLSKRMSCNFRLQLVSYCTL FLGAGLMSSLALWA

>CsZIP3

MLSISFLDLAHNAINSIGFLKGNLWFFAGV IFFAFIAHFIPEPSLGPVSDTKRRK  
DKDEGGKDIMKKHRRQVLYSGIITAIGISLHN FPEGMAVFLGSVKGLRVGLNL  
ALAIALHNIPEGVAVALPVYFATQSKWQAFKL ATLSGFAEPLGVVIVAYLFPSSL  
SPEILEGLLGSVGGVMAFLTLHEMLPLAFDYAG QKQAVKVVFLGMACMSASL  
YFLEISLPEDLSL

>CsZIP4

MTVSFKQVLLFSLFLFCGGAIAEIEHENSQ KIISAPDKNGIKVIDGSGTENLI  
GFEDTNYLLHERKGGSRVSVSTVAVFTLAMAA ATGLGAVPFFFVELDPQWAG  
LCNGMASGVMLAASFDLIQEGQEHGAGNWV VIGILAGGIFIWLCKKFLEQYG  
EVSMLDIKGADATKVVLVIGIMTLHSFGEGSG VGVVSFAGSKGFSQGLLVTLAIA  
VHNIPEGLAVSMVLASRGVSPQNALLWSVITSL PQPIVAVPSFICADAFNKFLPF  
CTGFAAGCMIWMVVAEVLPAFKEASPSQVASA ATLSVAFMEALSTLFQSFTH

EYNSGDVSGFFVSLLFGVGPLLGGVVLVAFAHAFHLQHALLMG TASGIAFILG  
AWRPLQLLFSSKMDFIPLTTLLSLGAAFIHFSSSSLLKLAGQKRASVNDLTTST  
NFSVSVHTLQSFLSCGAIAFHALAEG LALGVAAPKAYGFGRHIVLPVSLHGLP  
RGA AVASCIFGATDSWHGSLMSAALVG FVGPISAIGAILAGIDYSGLDHVMVL  
ACGGLLP SFGSIIKRAMRLDTQKSSSGLVIGLGFAILCLMCTKLVCLHTPYCNS  
APEAVR

>CsZIP5

MPMPMPHFNPSSL SLFFLLFLLLIPSVLAAPDCQCPEDSEDDGKRDETLALK  
YKVVAIATILVAGIIGVVIPLLGLKIPALSPEKDIFFIIKAFAAGVILATGFIHVLPD  
AYGNLTSSKLNEHPWGKFPFTGLVAMVAAIGTLMVDAGASSYYTRIHLNKAQ  
PELNGDDEMRRGGGCGAHDGHVHVHHTHGHGHAHGSADVGGSSTEILRHRVI  
SQVLELGIVVHSVIIIGLGVSESPETIRPLVAAITFHQLFEGMGLGGCIAQAKF  
KNRATILMGLFFCLTTPIGIAIGIAVTKTYDEDESPKALIVEGILNAASSGILIYMA  
LVDLLAADFMNPRMQSNGKLQLLANVSLILGAALMSLLAIWA

>CsZIP6

MPNSCFFPFIFASALVFSFLDLSFAHGS LGHHQCTHSHGHQHHAHHHHHDDD  
VSVTSKLLPEELAEEDMRLYGFGRPYVEHDHESVGSSDLSGLGLWIRALGCS  
LLISMASLICLILLPVIFVRGKPSKAVVDSLALFGAGAMLGDAFLHQLPHAFGG  
GKHS SHSHADHHGHSHSEDEHSHSHAHTLEDLSVGISVLAGIVLFLVEKIVRY  
VEDNSEGGNDWSHSHHHHHKKNKKLKDDSDSHDTTDKKGRAKLLDGVPNDS  
KEDQGTPQKSVPRKRNANSSSRDDKEDLVAANGPTADVNSSQEPPAKTPSNLV  
FGYLNLFSDGVHNFTDGMALGSAFLLYGSVGGWSRTVFLLAHELPQEIGDFGI  
LVRSGFSVAKALFFNFLSALVALAGTAIALLMGTDPGHSSLIEGFTAGGFIYIAV  
AGVLAEMNSSSKSTIKTTVFQLTSLVLGMAVALGISLFE

>CsZIP7

MAAACPTDFTHDSACRDGRAAAHLKLISIFLIFITSVIGVSSPVLLTRFFH GKPL  
YDKAILTVKSFAAGVILSTSLVHVLPDAFDALSDCRIASQHPWRDFPFSGLV TM  
VGALVALFVDVTATSHVGH DQYNPVEEKGGEE SGGEIGLLVAGERKSEETGG  
GGIIGEEESVKMKQKLVSKVLEIGIIFHSV IIGVTMGMSQNQCTIKPLVAALAFH  
QIFEGMGLGGCIAQAGFSFTTTAYMCFMFSVTTPMGIILGMILFSLTGYDDSNP  
KALIMEGLLGSSGILIYMALVDLIALDFFHNKLMTSNHCLKNICFIALLLGST  
SMSILALWA

>CsZIP8

MARNLIFLLLLLSFISLSFSDSIPSPDSECEAQLQQDCHDRAESLKLKLISIATILV  
ASMIGISLPLFSRAIPVLHPDGQTFAIVKAFASGVILATGYMHVLPDSYDFLTSP  
CLPENPWRKFPFPTFIAMLSAIMTLM LDSFSLSHFNKQSMQDQLSEEEEEINNE  
DRKEMSEN LGKEEGTGEKLGSQLLRHRVIAQILEAGIVVHSV VIGLSLGASEN  
PCTIRPLIAALCFHQLFEGMGLGGCILQAQYRIKMKAIMVFFFSVTTPFGIGLGI  
VLSNVYSENSPTALIVVGILNALSAGLLNYMALVNLLAHDFKGPKLQANLKL  
HIWAYVAVLMGVGGMSLLATWA

>CsZIP9

MLRFLFLLLSSAAAHSGHSDDDDSAAGDSLSPSPNLRSKPLILVKITCLILIFFG  
TFIPGISPCFFKWNDGFLLLGTQFAGGVFFGTAMMHFLSDANETFRDLTDNAY  
PFAFMLACLGLMTMAADCVISYLYRKPTADSS TDVELRGAATSPSKFQVQN

GSNGHHTHPHQALTMTMGSGDSILLIVALCFHVSFEGIAIGVAETKADAWKAL  
WTISLHKVFAAIAMGIALLRMIPNRPLLSSAAYSFAFAISSPIGIAIGIIIDATTQG  
AVADWIFAISMGLACGVFIYVSINHLLSKGYTPRDSVLVDNPNYKFLAVLLGIG  
VIAIVMIWDT

>CsZIP10

MSKFFFLFTLFLPALVSGVGASCSCDKSDGGGAVATKEAMKYKVGSIGSVLV  
AGAAGVSLPLVGKKIRCLRPENDIFFMIKAFAAGVILSTGFIHILPDAFQDLTSP  
CLGQNPWGDFFPAGFIAMAASIATLMVDTFATSFYQRRHFSKTKQVIADQETG  
NDHAGHVHVHTHATHGHAHGSAPTPTGELSLADLIRYRIISQVLELGIVVHSV  
IGISLGASVSPATIKPLLVALSFHQFFEGMGLGGCISQAQFRWRSAAAMATFFSL  
TAPVGIAVGIGISGAYRDNRTALIVEGSMNSASAGILIYMALVDLLAADFMNP  
RMQNNLGLQLGANISLLLGAACMSVLAKWA

>OsZIP1

MARTMTMRVSSLLVAVVLLAALSFAQACSGHGGINDGDGQVDAPATPASSSGV  
RSKGLIAVKVWCLVILLVFTFAGGVSPYFYRWNESFLLLGTQFAAGVFLGTAL  
MHFLADSTSTFKGLTTNQYPFSFMLTCVGFLTMLS DLVIAAVARRSAAAGVS  
DNQVSEQQQRQQAEGAVMSRKEEEAAVAHPAMLVRTSSFEDAVLLIVALCF  
HSVFEGIAIGVSASKSEAWRNLTIGLHKIFAAMGIALLRMIPKRPFLMTVV  
YSLAFVSSPVGVGIGIAIDATSQGRAADWTYAISMGLATGVFIYVAINHIAK  
GYRPHHTAADKPLFKFLAVLLGVAVMAVVMWDT

>OsZIP2

MAGGRGARASLHLHLAWLCAFATTAWAHGGGGGGGSDADADGGGEGKPD  
LRARGLVAAKLWCLAVVFAGTLAGGVSPYFMRWDAFLALGTQFAGGVFLG  
TAMMHFLADANETFADLLPGTAYPFAFMLACAGYVLTMLADCAISFVVARGG  
GRTEPAAAAGAGLEEGKLSSTNGNASDPPAADAAAQDHSVASMLRNASTLG  
DSVLLIAALCFHVSFEGIAIGVAETKADAWKALWTISLHKIFAAMGIALLRM  
LPDRPFLSCFGYAFVAVSSPVGVGIGIVIDATTQGRVADWIFAVSMGLATGIFIY  
VSINHLLSKGYTPLRPVAADTPAGRLLAVVLGVAVIAVVMWDT

>OsZIP3

MGAKKHTLQVLPWLLLFAQHTAASACDCANTTDGADRQGAMKCLKLIAIASI  
LAAGAAGVLVPVIGRSMAALRPDGDIFFAVKAFAGVILATGMVHILPAAFDA  
LTSPCLKRGGGDRNPFPFAGLVSMSAAVSTMVVDSLAAGYYHRSQFRKARPV  
DNINVHKHAGDERAEHAQHINAHTHGGHTHSHGDIVVCGSPEEGSVAESIRH  
KVVSQVLELGILVHSVIGVSLGASVRPSTIRPLVGALSFHQFFEGVGLGGCIVQ  
ANFKVRATVIMAIFFSLTAPVGIVLGIAISSSYNVHSSTAFVVEGVFNSASAGILI  
YMSLVDLLATDFNNPKLQINTKLQLMAYLALFLGAGLMSMLAIWA

>OsZIP4

MDAMRQSTPRAMLLLCVLMLAVAPPGAATAAAVAGCECGNAAAAAVAGED  
ARGALRLKLVAIASILAAGAAGVLVPVLGRSFAALRPDGDVFFAVKAFAGVI  
LATGMVHILPAAFDALASPCGGGRGGGGGFPFAGLVAMAAAMATMMIDSVA  
AGYYRRSHFKKPRPVDDPADAARAAGVEEGGAEHAGHVHVHTHATHGHAH  
GHVHSHGHGHGHSHGSAPAAATSPEDASVAETIRHRVVSQVLELGILVHSVIG  
VSLGASLRPSSIRPLVGALSFHQFFEGIGLGGCIVQANFKAKATVIMATFFSLTA  
PVGIALGIAISSYSKHSSTALVVEGVFNSAAAGILIYMSLVDLLAADFNNPKL



QTNTKLQLAVYLALFLGAGMMSLLAIWA

>OsZIP5

MATAAMTKVFVLLFLVAACYLPAHAAAAECDCATDTAGRDKAQALRLKVIAI  
FCILAGSTVGAALPSLGGRFPAIQPETDVFLSVKAFAGGVILATGLVHILPAAFE  
ALSSPCLVGGPWKRFPFAGMVAMVSAIGTLIVDTVATGYFHRTDAKRKAAAV  
ADEPADDLEASDEHSHGHAGHGMMSVMSVAPAGEEDLVRHRVISQVLELGVVV  
HSLIIGMSLGASDFPSTVRPLVPALTFHQFFEGIGLGGCIVQAKFRVRSVVTMA  
LFFSLTTPAGIVVGIGISSVYDANSPTALVVQGLLEAAAAGILVYMALVDILAE  
DFMKTQVQRRGRLQLAMNVALLLGAGLMSMIAIWA

>OsZIP6

MSGTGCFPAGEMAAVARVCRDGAARLKTGSLLAILVASAVGICLPVALTGA  
FRGKAGYARGLLLKCYAAGVILSTSLVHVLPDAHAALADCAVATRRPWRDF  
PFAGLFSLVGALLALLVDLSASSHLEAHGHHQHAEEGESPPPPPPHQPYPAPIPT  
TKKSPVFELSGEMSPKKRAHSDDTDRDDVALFGAKSAVRSDEVVVAPRVGCH  
GHHDVVEVGEEGGGGGEEEEARRKQKMVSKVLEIGIVFHSVIIGVTMGMSQD  
VCAIRPLVVALSFHQVFEGMGLGGCIAQAGFGIATVGYMCVMFSVTTPLGILL  
GMAIFHMTGYDDSSPNALHIEGLLGSLSGILVYMALVDLISLDFHNMMSSS  
NKLKKVSYVALVLGSASMSILALWA

>OsZIP7

MERFVQFLRRGNGLMAASLAAGSCAEVAKAEGAGCRDDAAALRLKGVAM  
ATILVAGVVGVGLPLAGRKRRALRTDSAAFVAAKAFAGVILATGFVHMLHD  
AEHALSSPCLPAHPWRSFPFPGFVAMSAALATLVLDLAFRYEGKHRAETER  
VKAAAAAALAASSASDDDDITVTVTEDDNDNKAPLLQPHSHSHSHPHGHGH  
GHELAQPEGSGGEGEVPAQVRSVVVSQILEMGIVSHSVIIGLSLGVSRSPCTIRP  
LVAALSFHQFFEGFALGGCIAQAQFKTLSAAIMACFFAITTPAGIAAGAGVASF  
YNANSPRALVVEGILDSVSAGILIYMSLVDLIAADFLGGKMTGSTRQQVMAYI  
ALFLGALSMSSLAIWA

>OsZIP8

MRTNTTATVLLAAAVALLATAARGDGGDGGCGKEDAAAGRDRARARGLKI  
AAFFSILVCGALGCGLPSLGRHVPALRPDGDVFFLVKAFAAGVILATGFIHILPD  
AFDNLTDCLPAGGPWKEFPFAGFGAMVGAIGTLVVDTLATGYFTRALSCKD  
AATAAAVADEEKQSAAATQQHNHHHNHHVVGDGGGGGEEHEGQVHVHHTHA  
THGHAHGSSALVAAGEDDKETTLRHRVISQVLELIGIVVHSVIIGISLGASQNP  
ETIKPLVVALSFHQMFEGMGLGGCIVQAKFKVRSIVTMVLFFCLTTPVGIAVG  
VGISSVYNESPTALVVEGILNSVAAGILIYMALVDLLAEDFMNPRVQSKGKLQ  
LGINLAMLAGAGLMSMLAKWA

>OsZIP9

MAFDLKLTAACLLAVFSLAAAADCECQPSDEGHDAAKSRTLKVIAIFCILVGSS  
AGCAIPSLGRRFPALRPDTSLFFALKAFAGVILATAFVHILPVSFDKLGSPCLV  
DGPWRKYPTGLVAMLA AVATLLLDTIATGYFLQRAQDSRGAVA AVAACGGD  
ASSSHDHERGNAHGVSASIASATMPNDAADDCDDAEDRAKLVRHRVISQVF  
ELGIIVHSIIIIGISLGASESPSTIRPLVAALTFHQFFEGIGLGGCIVQARFHLKSAVT  
MAIFFSLTTPVGIMIGIGISSAYNENSPTALIVEGILDAAAAGILNYMALVDLLA  
EDFMNPRVRKSGRLQLIISILLVGIALMSLLGIWA

>OsZIP10

MESSSSSSYIPFIRQIAASVSAASCDVVGGGGDKDEECRDEAAALRLKMOVAV  
AAILIAGAAGVAIPLVGRRRRRGGGGGGGGGASSGGLFVLAKAFAAGVILATGF  
VHMLHDAEHALSNPCLPHSPWRRFPFPGFVAMLAALATLVVDFVGTHTFYERK  
HRQEEAAAAAEEAAAALLEDGGALPVGDGEGRDGRGGKRDAMHIVGIHAH  
AAAHRHSHAHVHGACHGGAVNDAHAHGHGHGHGHEEGPSARHVVVVSQILELGI  
VSHSVIIGLSLGVVSQSPCTIKPLVAALSFHQFFEGFALGGCISEAQLKNFSAFLM  
AFFFAITTPAGITVGA AVASFYNPNSPRALVVEGILDSMSAGILIYMALVDLIAA  
DFLSRKMSCNPRLQVGSYIALFLGAMAMAAALALWA

>OsZIP11

MDPKVVVALALSLIGGLSTSLGALLAILNCAPNNKTLGMLQGFIATGLMLSMS  
FFDLAYDAVNAIGFLKGNLWFFAGALLFSTIAEVFPEPDCNLADENDKHLENK  
TGNNNIAGKELMMRHRRRRVIFS VVVTAIVAGVSLQNFVPVGTAAFLGTTKGFRV  
GLNLSLAIALHYIPEGISVALPAYFATCSKWQAFKLATLSGFAEPLGVIIIVAYLFP  
SNLNPEILEGLLGLVGGVMAFLTLYEMLPIAFEYAGRKDAVKAVFVGMAFMS  
MSLHFLDISLPKEMGA\*

>OsZIP12

MAFDLKLTAACLLAVFSLAAAADCECQPSDEGHDAAKSRTLKVIAIFCIVLGSS  
AGCAIPSLGRRFPALRPDTSLFFALKAFAAGVILATAFVHILPVSFDKLGSPCLV  
DGPWRKYPTGLVAMLA AVATLLLDTIATGYFLQRAQDSRGAVA AVAACGGD  
ASSSHDHERGNAHGVSSAVIASATMPNDAADDCDDAEDRAKLVRHRVISQVF  
ELGIIVHSIIIGISLGASESPSTIRPLVAALTFHQFFEGIGLGGCIVQARFHLKSAVT  
MAIFFSLTTPVGIMIGIGISSAYNENSPTALIVEGILDAAAAGILNYMALVDLLA  
EDFMNPRVRKSGRLQLIISILLVGIALMSLLGIWA\*

>OsZIP13

MDSRVGVVLFLLFVLVRDVS AVAETE VGVVRVVQEAPDRKLEGAGGQDGF  
KSGKVPVSTVAWSTLAMAAATGLGALPFFLELEAQWAGLCNGLAAGVMLA  
ASFDLVQEGQMYGSGSWVVFILSGGFFIWLCKKFLEQYGEVSMLDIKGADA  
SKVILVVGIMTLHSFGE GSGVGVSFAGSKGFSQGLLV TIAIAVHNIPEGLAVSM  
LLSSRGVSPQKAMIWSIITSLPQPIVAVPAFLCADAFQKVLPFCTGFAAGCMIWI  
VIAEVLPAFKEAAPSQVASAGTLAVAFMETLGTVLQGFTDGHNS EDTAGFLV  
SLVFGLGPLFGGIVLVAFSLTFSMPHPLLTGVASGIAFRLAAWRPLQLLMSSKM  
GLFTTLFLLIGGSLIYHVATSNILQLVNRKKSSVNVITSSSGLSLSVLTLQSLAC  
GSVFLHAYA EQLGVAARKAYGLGRYMVLPVSLHGLPRGA AVASCIYGATD  
SWRAALAAAALTGFAGPSAAISAILAKIDYSGLDYWMVIACGALIPSFGRVFK  
RSLRLDMRKSICGLLIGFAFASVCLMSTRFICLHTPYCNSAPEAVT\*

>OsZIP14

MRGGLLVLLLLTA AVAGGGGHEGSSSCPFHAHDKPHDDHHHGHGHGHGHSC  
GGGGDDSHHVHHHHHHGHGHGHGHDGGIQRRLPEELAE EADLELDSFGDHHHH  
HHHHHEHHHHHDHHHGHGDFQAELSPLGMWLSAMGCSLLVSMASLVCLVLL  
PVIFFQGKPSKTMVDCLAIFGAGAMLGDSFLHQLPHAFGGGHSHTHDHQNHN  
HSHEHSHAHSLEDLSIGLSVLFGIVFFFIVEKIVRYVEDNSQKGAHGMGHHHH  
HHKRHDRSDKAKLNHAEKDHDKG V NQAEKEPSHDGAIEKTDGVTRADSKS  
AIRKRLSSGSNSADREPVNSESDPAPNKALSSSEDSSVSNSNMVFGYLNLFSD

GVHNFTDGMALGSAFLLHGSVGGWSRTLFLLAHELPQEVDGFGILVRSRGFTV  
TKALFFNFLSALVALAGTALALSLGKDPGHSSLIEGFTAGGFIYIAVAGVLP  
NDQKTTVKSSMIQLVSLTMGMLVALGISLVE\*

>OsIRT1

MATPRTLVPILPPVAALLLLLVAASSIPILAAQPADACGGAPDQAAADGACHD  
VPRALRLKLIAIPTILVSSVVGVCPLLSRSVPALRPDGGGLFAVVKAFA  
SGVILATGYMHVLPDAFNLTSPCLPRKPWSEFPFAAFVAMLA  
AVSTLMADSLMLTYYNRSKPRPSSGGDVA  
AVADHGESPDQGHRHGHGHGHGHGM  
AVAKPDDVEATQVQLRRNRVVVQV  
LEIGIVVHSVVI  
GLGMGASQNVCTIRPLVAAMCFHQM  
FEGMGLGGCILQAEYGRRMRSVLV  
FFFSTTT  
PFGIALGLALTRVYRDNSPTALIVVG  
LLNAASAGLLHYMALVELLAADFMGPKLQGNVRLQLAAFLAVLLGAGGMS  
VMAKWA\*

>OsIRT2

MLAAVFTLMVDSLMLTFHTRGSKGRASSAVAHHGDHGHCHAHALGQADVA  
ALSTTEAADQGS  
GDVEAGNTTKAQLLRNRVIVQVLEM  
GIVVHSVVI  
GLGMGASQNVCTIRPLVAALCFHQM  
FEGMGLGGCILQAGYGGRTSALV  
FFFSTTT  
PFGIALGLALTRVYSDSSPTALVVVGLLNAASAGLLHYMALVELLAADFMGPKL  
QGNVRLQLAASLAILLGAGGMSVMAKWA\*
