# Supplementary material
Source: MDPI journal article supplement (https://www.mdpi.com/2077-0472/14/1/133)
Supplement: s1 [file s1]

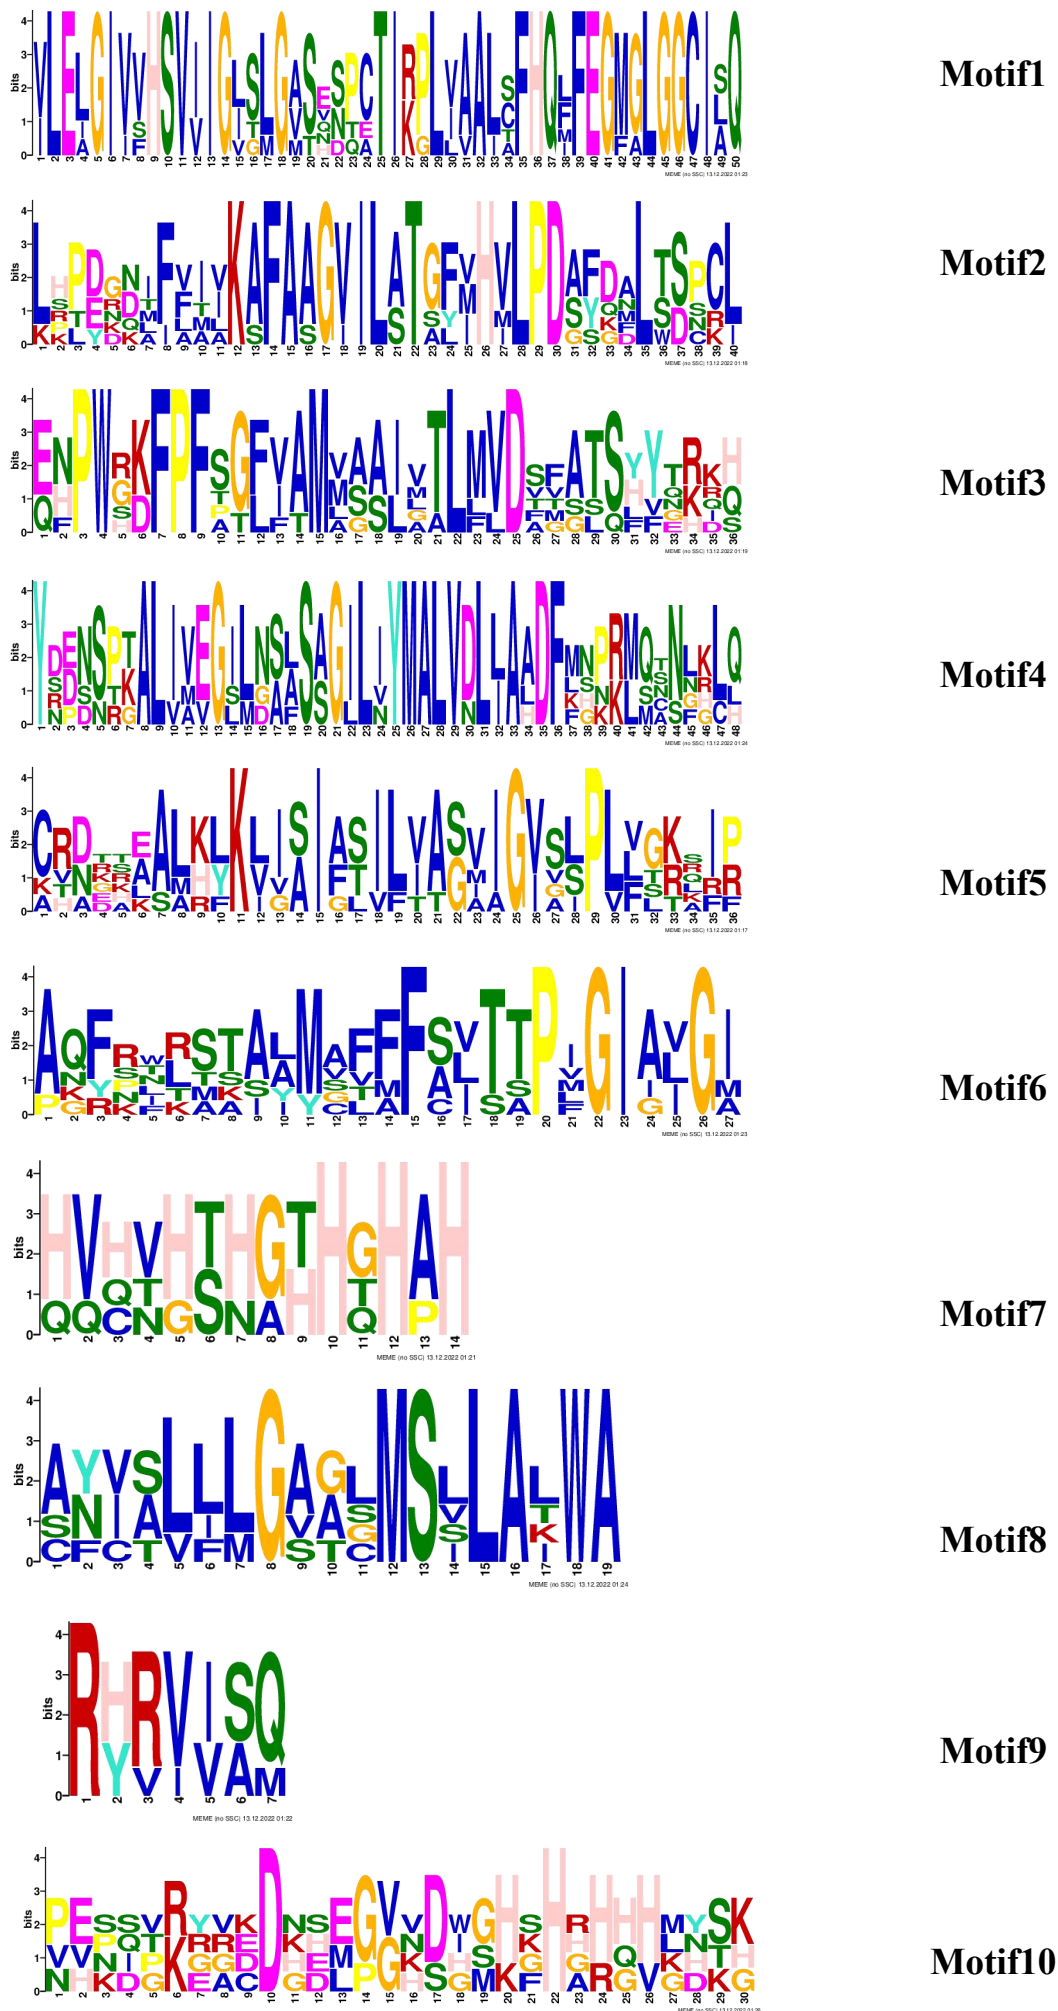

Figure S1. Sequence logo of 10 conserved motifs of CsZIP. The stacking height and residue size represent the conservation level and the relative occurrence frequency, respectively, at the indicated position.
